# Supplementary material for: Characterization of Amoeboaphelidium protococcarum, an Algal Parasite New to the Cryptomycota Isolated from an Outdoor Algal Pond Used for the Production of Biofuel
Source: PubMed Central journal article supplement (PMC3577820; doi:10.1371/journal.pone.0056232), 2013-02-20
Supplement: pone.0056232.s002.pdf [file pone.0056232.s002.pdf]

Supporting Information Table S1. Sequence identifiers for Figure 3.

| Species                          | SSU        | 5.8S       | LSU         |
|----------------------------------|------------|------------|-------------|
| <i>Rozella allomycis</i>         | AY635838.1 | AY997087.1 | DQ273803.1  |
| <i>Rozella</i> sp. JEL347        | AY601707.1 | AY997086.1 | DQ273766.1  |
| strain X-5                       | JX507298.1 | JX507298.1 | JX507298.1  |
| <i>Saccharomyces cerevisiae</i>  | Z75578.1   | 1360587    | AY048154.1  |
| <i>Schizosaccharomyces pombe</i> | 288694     | 288694     | 288694      |
| <i>Neolecta vitellina</i>        | Z27393.1   | FJ171855.1 | NG_027573.1 |
| <i>Glomus mosseae</i>            | AY635833.1 | AY997053.1 | NG_027652.1 |
| <i>Paraglomus occultum</i>       | DQ322629.1 | AY997069.1 | DQ273827.1  |
| <i>Geosiphon pyriformis</i>      | AM183923.1 | AM268204.3 | AM183920.2  |
| <i>Spiromyces spiralis</i>       | AF007543.1 | AY997090.1 | DQ273801.1  |
| <i>Furculomyces boomerangus</i>  | AF277013.1 | AY997050.1 | DQ273809.1  |
| <i>Piptocephalis corymbifera</i> | AB016023.1 | AY997073.1 | AY546690.1  |
| <i>Allomyces arbuscula</i>       | AY552524.1 | AY997028.1 | AY552525.1  |
| <i>Blastocladiella emersonii</i> | EF014366.1 | AY997032.1 | 2440036     |
| <i>Physoderma maydis</i>         | AY601708.1 | AY997072.1 | DQ273768.1  |
| <i>Chytrium hyalinus</i>         | M59758.1   | DQ536499.1 | DQ273836.2  |
| <i>Polychytrium aggregatum</i>   | AY601711.1 | AY997074.1 | AY546686.1  |
| <i>Batrachochytrium</i> sp.      | AF051932.1 | AY997031.1 | AY546693.1  |
| <i>Encephalitozoon cuniculi</i>  | 3426080    | 3426080    | 3426080     |
| <i>Nosema trichoplusiae</i>      | U09282.1   |            | DQ996243.1  |
| <i>Vairimorpha necatrix</i>      | DQ996241.1 | EU544673.1 | DQ996242.1  |
| <i>Nosema ceranae</i>            | DQ078785.1 | EF091879.1 | DQ078785.1  |
