# Supplementary material for: Characterization of Amoeboaphelidium protococcarum, an Algal Parasite New to the Cryptomycota Isolated from an Outdoor Algal Pond Used for the Production of Biofuel
Source: PubMed Central journal article supplement (PMC3577820; doi:10.1371/journal.pone.0056232), 2013-02-20
Supplement: pone.0056232.s003.pdf [file pone.0056232.s003.pdf]

Supporting Information Table S2. Comparison of gene regions in rDNA sequences of isolate FD01 *Amoebophilidium protococcarum* and strain X-5 (Karpov et al. 2012).

|          | <u>strain X-5</u> | <u>isolate FD01</u> | <u>Sequence similarity</u> |
|----------|-------------------|---------------------|----------------------------|
| rDNA     | 1-5774 bases      | 1-4667 bases        |                            |
| ∅ region | 1-98              |                     |                            |
| 18S      | 99-1890           | 1-2271              | 67%/86% <sup>1</sup>       |
| ITS1     | 1891-2086         | 2272-2630           | 35%                        |
| 5.8S     | 2087-2241         | 2631-2798           | 84%                        |
| ITS2     | 2242-2407         | 2799-3140           | 30%                        |
| 28S      | 2408-5774         | 3142-4667           | 78% <sup>2</sup>           |

<sup>1</sup> The 18S region of isolate FD01 has regions (bases 1156-1522 and 1528-1651 from the 5' end)) that are absent in strain X-5. When sequences are compared without removing the regions, sequence similarity is 67%; when the regions are removed, sequence similarity is 86%.

<sup>2</sup> The 28S region of strain X-5 is complete, at 3367 bases; the 28S region of isolate FD01 is partial, at 1527 bases. When the 3' end of the strain X-5 sequence is shortened to the length of the isolate FD01 sequence, similarity is 78%.
